# Supplementary material
Source: PubMed Central journal article supplement (PMC5612424)

## Supplementary Online Content

Rinaldi C, Schmidt T, Situ AJ, et al. Mutation in *CPT1C* associated with pure autosomal dominant spastic paraplegia. *JAMA Neurol*. Published online March 9, 2015. doi:10.1001/jamaneurol.2014.4769.

**eFigure 1.** Diagram of the filtering strategy for the exome sequencing data.

**eFigure 2.** Comparison of spectral and structural parameter of N $\beta$  and N $\beta$  (Arg37Cys) of human CPT1C.

**eFigure 3.** iPSC-derived motor neurons from an unaffected subject were stained for SMI-32 (Covance, SMI-32R, 1:1,000) and CPT1C (Proteintech, 12969-1-AP; 1:1,000).

**eFigure 4.** Western blot analysis of CPT1C.

**eFigure 5.** COS7 cells were transfected with 1.5  $\mu$ g HA-tagged CPT1C and signal was detected using anti-HA (Covance, clone 16B12, 1:5,000), anti-Calreticulin antibody (Calbiochem, 208910, 1:1,000), and anti-AIF antibody (Millipore, AB16501, 1:1,000).

**eFigure 6.** COS7 cells were co-transfected with 1.5  $\mu$ g GFP-tagged sec61, HA-tagged CPT1C wild-type or mutant, HA-empty vector and GFP-empty vector as specified in the picture.

This supplementary material has been provided by the authors to give readers additional information about their work.

**eFigure 1.** Diagram of the filtering strategy for the exome sequencing data.

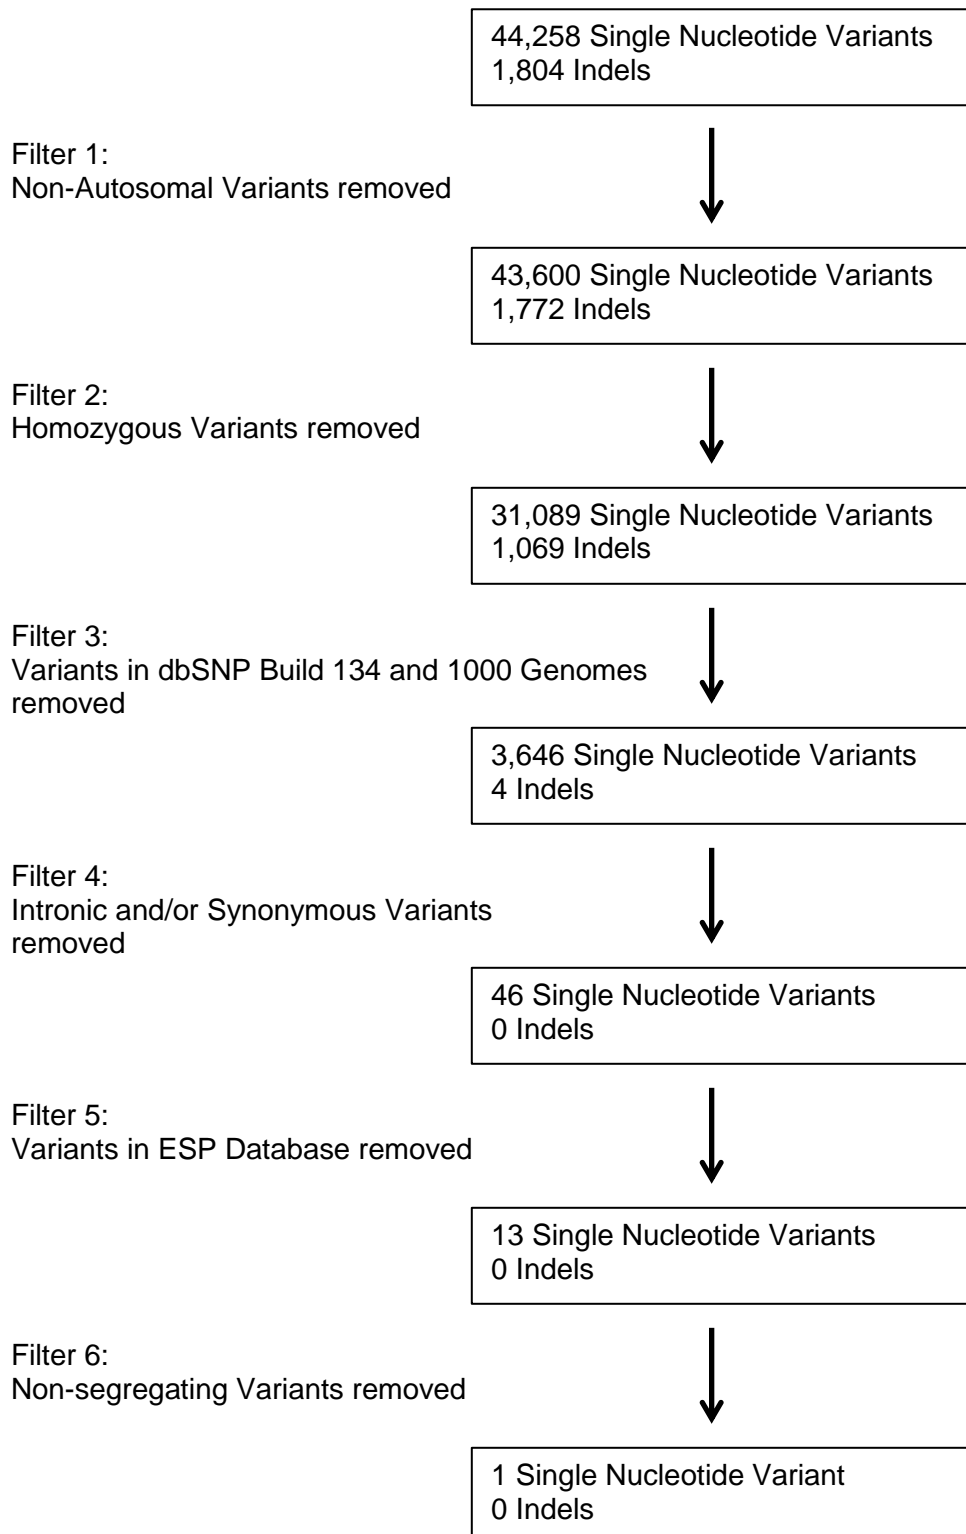

**eFigure 2.** Comparison of spectral and structural parameter of N $\beta$  and N $\beta$  (Arg37Cys) of human CPT1C.

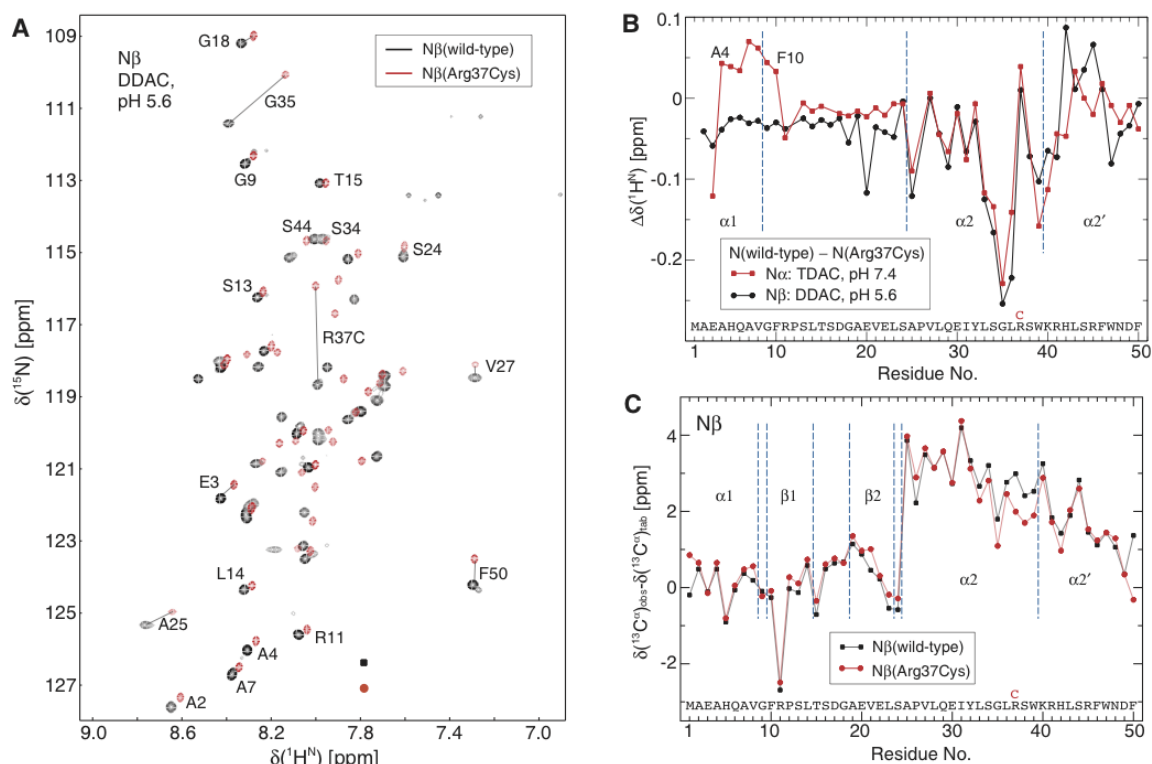

(A) Superposition of  $^1\text{H}^{\text{N}}\text{-}^{15}\text{N}$  correlation NMR spectra of wild-type N $\beta$  and N $\beta$ (Arg37Cys). The spectra were recorded in the presence of dodecyltrimethylammonium chloride (DDAC) at pH 5.6, 35  $^{\circ}\text{C}$  and a  $^1\text{H}$  frequency of 700 MHz. (B)  $^1\text{H}^{\text{N}}$  chemical shift differences,  $\Delta\delta(^1\text{H}^{\text{N}})$ , between N $\alpha$  and N $\alpha$  (Arg37Cys), and N $\beta$  and N $\beta$ (Arg37Cys). The borders of the secondary structure elements of N $\alpha$ , helices  $\alpha 1$ ,  $\alpha 2$ , and  $\alpha 2'$ , are indicated. (C) Comparison of N $\beta$  and N $\beta$ (Arg37Cys) secondary  $^{13}\text{C}^{\alpha}$  chemical shifts,  $d(^{13}\text{C}^{\alpha})$ , defined as the difference between observed and tabulated, random coil  $^{13}\text{C}^{\alpha}$  shifts. Positive and negative shifts indicate helical and extended backbone conformations, respectively (Wishart & Case, 2001). The borders of all possible N $\alpha$  and N $\beta$  secondary structure elements, helices  $\alpha 1$ ,  $\alpha 2$ ,  $\alpha 2'$ , and sheets  $\beta 1$ ,  $\beta 2$  are indicated (Rao et al, 2011).

**eFigure 3.** iPSC-derived motor neurons from an unaffected subject were stained for SMI-32 (Covance, SMI-32R, 1:1,000) and CPT1C (Proteintech, 12969-1-AP; 1:1,000).

The nuclear DAPI stain is blue. Scale bar=20  $\mu$ m.

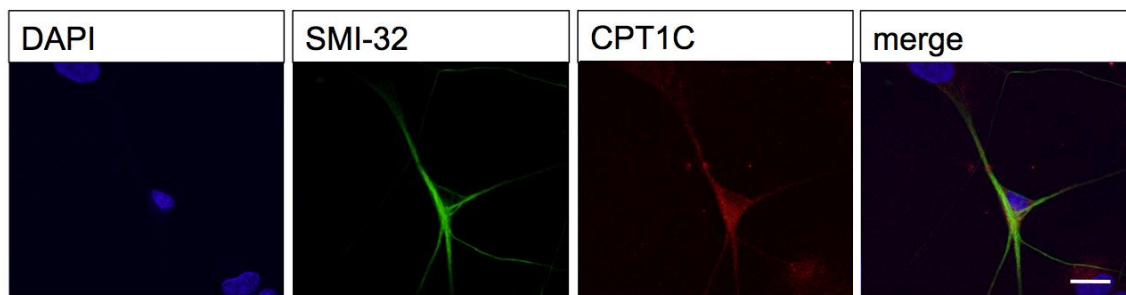

**eFigure 4.** Western blot analysis of CPT1C.

(antibody developed following the indications in the previous study by Carrasco et al., 2012, by Sigma-Genosys; cropped image) expression in different samples. 1) Ganglion (the majority are sensory neurons); 2) ventral horn of the spinal cord (the majority are motor neurons); and 3) cortex from WT mice.

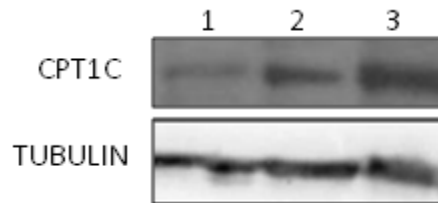

**eFigure 5.** COS7 cells were transfected with 1.5  $\mu\text{g}$  HA-tagged CPT1C and signal was detected using anti-HA (Covance, clone 16B12, 1:5,000), anti-Calreticulin antibody (Calbiochem, 208910, 1:1,000), and anti-AIF antibody (Millipore, AB16501, 1:1,000).

The nuclear DAPI stain is blue. Scale bar=20  $\mu\text{m}$ .

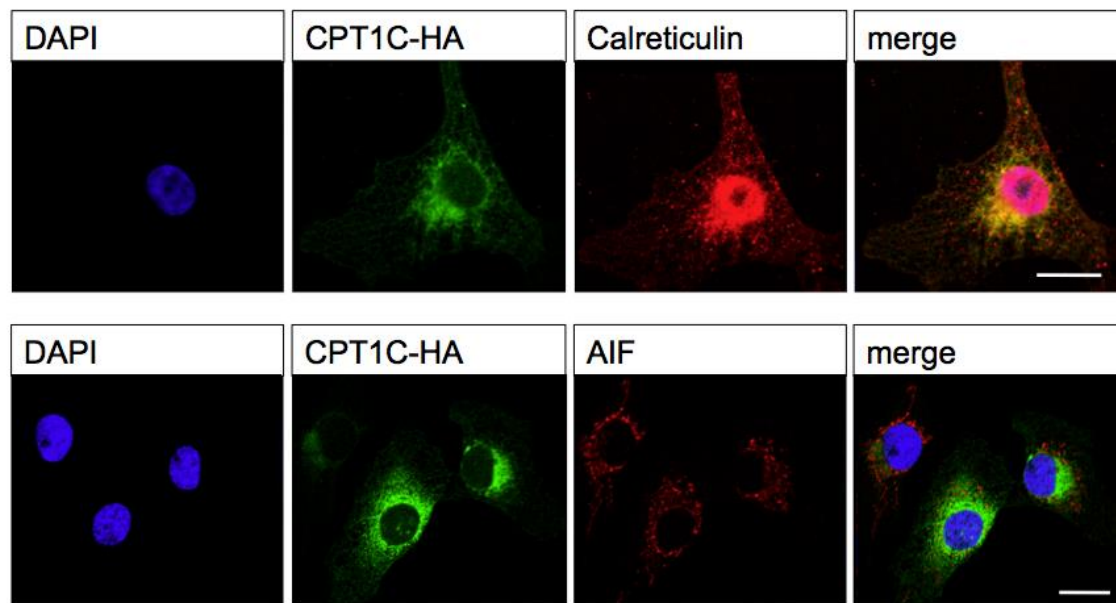

**eFigure 6.** COS7 cells were co-transfected with 1.5  $\mu$ g GFP-tagged sec61, HA-tagged CPT1C wild-type or mutant, HA-empty vector and GFP-empty vector as specified in the picture.

Co-Immunoprecipitation was detected using an anti-HA antibody (Covance, clone 16B12, 1:5,000) and anti-GFP antibody (IP: molecular probe, A-11122; IB: abcam, ab290, 1:5,000).

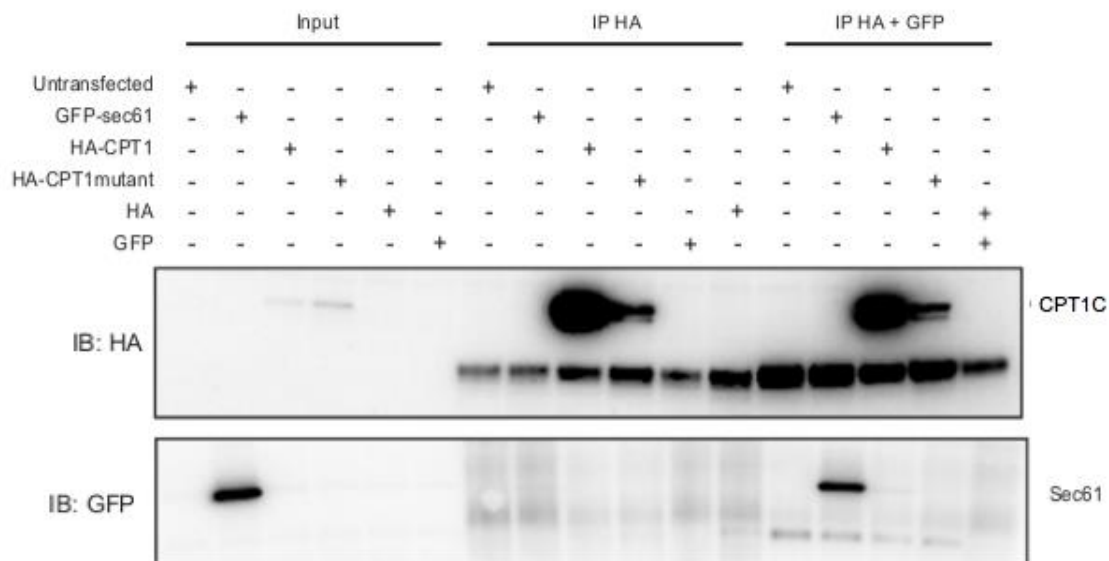

Supplement: NIHMS671348-supplement-supplement.pdf [file NIHMS671348-supplement-supplement.pdf]
